# Supplementary material for: Cooperative Enhancer Activation by TLX1 and STAT5 Drives Development of NUP214-ABL1/TLX1-Positive T Cell Acute Lymphoblastic Leukemia
Source: PubMed Central journal article supplement — Cancer Cell. 2018 Aug 13;34(2):271–285.e7. doi: 10.1016/j.ccell.2018.07.007 (PMC6097876; doi:10.1016/j.ccell.2018.07.007), 2018-08-13
Supplement: mmc1.pdf [file mmc1.pdf]

**Cancer Cell, Volume 34**

**Supplemental Information**

**Cooperative Enhancer Activation by TLX1 and STAT5**

**Drives Development of NUP214-ABL1/TLX1-Positive**

**T Cell Acute Lymphoblastic Leukemia**

**Marlies Vanden Bempt, Sofie Demeyer, Michaël Broux, Jolien De Bie, Simon Bornschein, Nicole Mentens, Roel Vandepoel, Ellen Geerdens, Enrico Radaelli, Beat C. Bornhauser, Andreas E. Kulozik, Jules P. Meijerink, Jean-Pierre Bourquin, Charles E. de Bock, and Jan Cools**

**Table S1 (Related to Figure 1): NUP214-ABL1<sup>+</sup> T-ALL cases from published studies**

| #                       | Gender | Adult/Pediatric | Age | Immune phenotype | ABL1               | Other alterations |
|-------------------------|--------|-----------------|-----|------------------|--------------------|-------------------|
| Graux et al., 2004      |        |                 |     |                  |                    |                   |
| 1                       | M      | A               | 52  | cortical         | NUP214-ABL1 fusion | TLX1              |
| 2                       | M      | P               | 3   | cortical         | NUP214-ABL1 fusion | TLX1              |
| 3                       | M      | A               | 23  | cortical         | NUP214-ABL1 fusion | TLX1              |
| 4                       | M      | P               | 7   | mature           | NUP214-ABL1 fusion | TLX3              |
| 5                       | M      | A               | 25  | mature           | NUP214-ABL1 fusion | TLX3              |
| 6                       | F      | P               | ped | cortical         | NUP214-ABL1 fusion | TLX3              |
| 7                       | M      | P               | 9   | ?                | NUP214-ABL1 fusion | TLX3              |
| 8                       | M      | P               | 4   | ?                | NUP214-ABL1 fusion | TLX3              |
| 9                       | F      | A               | 31  | pre T            | NUP214-ABL1 fusion | TLX1              |
| Graux et al., 2008      |        |                 |     |                  |                    |                   |
| 10                      | M      | A               | 28  | mature           | NUP214-ABL1 fusion | TLX3              |
| 11                      | F      | A               | 36  | cortical         | NUP214-ABL1 fusion | TLX1              |
| 12                      | M      | P               | 3   | pre T            | NUP214-ABL1 fusion | TLX1              |
| 13                      | F      | P               | 14  | cortical         | NUP214-ABL1 fusion | TLX3              |
| 14                      | F      | P               | 6   | ?                | NUP214-ABL1 fusion | TLX3              |
| 15                      | F      | A               | 28  | Cortical         | NUP214-ABL1 fusion | TLX1              |
| 16                      | M      | A               | 22  | Cortical         | NUP214-ABL1 fusion | TLX1              |
| 17                      | M      | P               | 7   | Cortical         | NUP214-ABL1 fusion | TLX3              |
| 18                      | M      | P               | 18  | Cortical         | NUP214-ABL1 fusion | TLX1              |
| 19                      | M      | P               | 11  | pre T            | NUP214-ABL1 fusion | TLX3              |
| 20                      | M      | A               | 26  | Cortical         | NUP214-ABL1 fusion | TLX3              |
| 21                      | M      | P               | 5   | pre T            | NUP214-ABL1 fusion | TLX3              |
| 22                      | M      | P               | 8   | pre T            | NUP214-ABL1 fusion | TLX3              |
| 23                      | M      | P               | 17  | pre T            | NUP214-ABL1 fusion | TLX3              |
| 24                      | M      | P               | 12  | pre T            | NUP214-ABL1 fusion | TLX3              |
| 25                      | M      | A               | 40  | pre T            | NUP214-ABL1 fusion | TLX1              |
| 26                      | M      | A               | 48  | Cortical         | NUP214-ABL1 fusion | TLX1              |
| 27                      | M      | P               | 9   | ?                | NUP214-ABL1 fusion | TLX3              |
| 28                      | M      | P               | 11  | ?                | NUP214-ABL1 fusion | TLX3              |
| 29                      | M      | P               | 12  | ?                | NUP214-ABL1 fusion | TLX3              |
| 30                      | F      | P               | 14  | ?                | NUP214-ABL1 fusion | TLX3              |
| 31                      | M      | A               | 42  | ?                | NUP214-ABL1 fusion | TLX1              |
| 32                      | M      | P               | 2   | ?                | NUP214-ABL1 fusion | TLX1              |
| 33                      | M      | A               | 36  | ?                | NUP214-ABL1 fusion | TLX1              |
| Burmeister et al., 2006 |        |                 |     |                  |                    |                   |
| 34                      | M      | A               | 18  | thymic           | NUP214-ABL1 fusion | TLX3              |
| 35                      | M      | A               | 20  | thymic           | NUP214-ABL1 fusion | /                 |
| 36                      | M      | A               | 39  | thymic           | NUP214-ABL1 fusion | TLX1              |
| 37                      | M      | A               | 34  | thymic           | NUP214-ABL1 fusion | TLX1              |

|                  |   |   |    |              |                    |      |
|------------------|---|---|----|--------------|--------------------|------|
| 38               | M | A | 28 | thymic       | NUP214-ABL1 fusion | TLX1 |
| 39               | M | A | 23 | thymic       | NUP214-ABL1 fusion | TLX1 |
| 40               | M | A | 18 | thymic       | NUP214-ABL1 fusion | /    |
| 41               | M | A | 18 | early T      | NUP214-ABL1 fusion | TLX3 |
| 42               | F | A | 27 | thymic       | NUP214-ABL1 fusion | TLX1 |
| Liu et al., 2017 |   |   |    |              |                    |      |
| 43               | M | P | 13 | Cortical     | NUP214-ABL1 fusion | TLX1 |
| 44               | M | P | 4  | ?            | NUP214-ABL1 fusion | TLX3 |
| 45               | M | P | 7  | Cortical     | NUP214-ABL1 fusion | TLX3 |
| 46               | M | P | 7  | Pre-cortical | NUP214-ABL1 fusion | TLX3 |

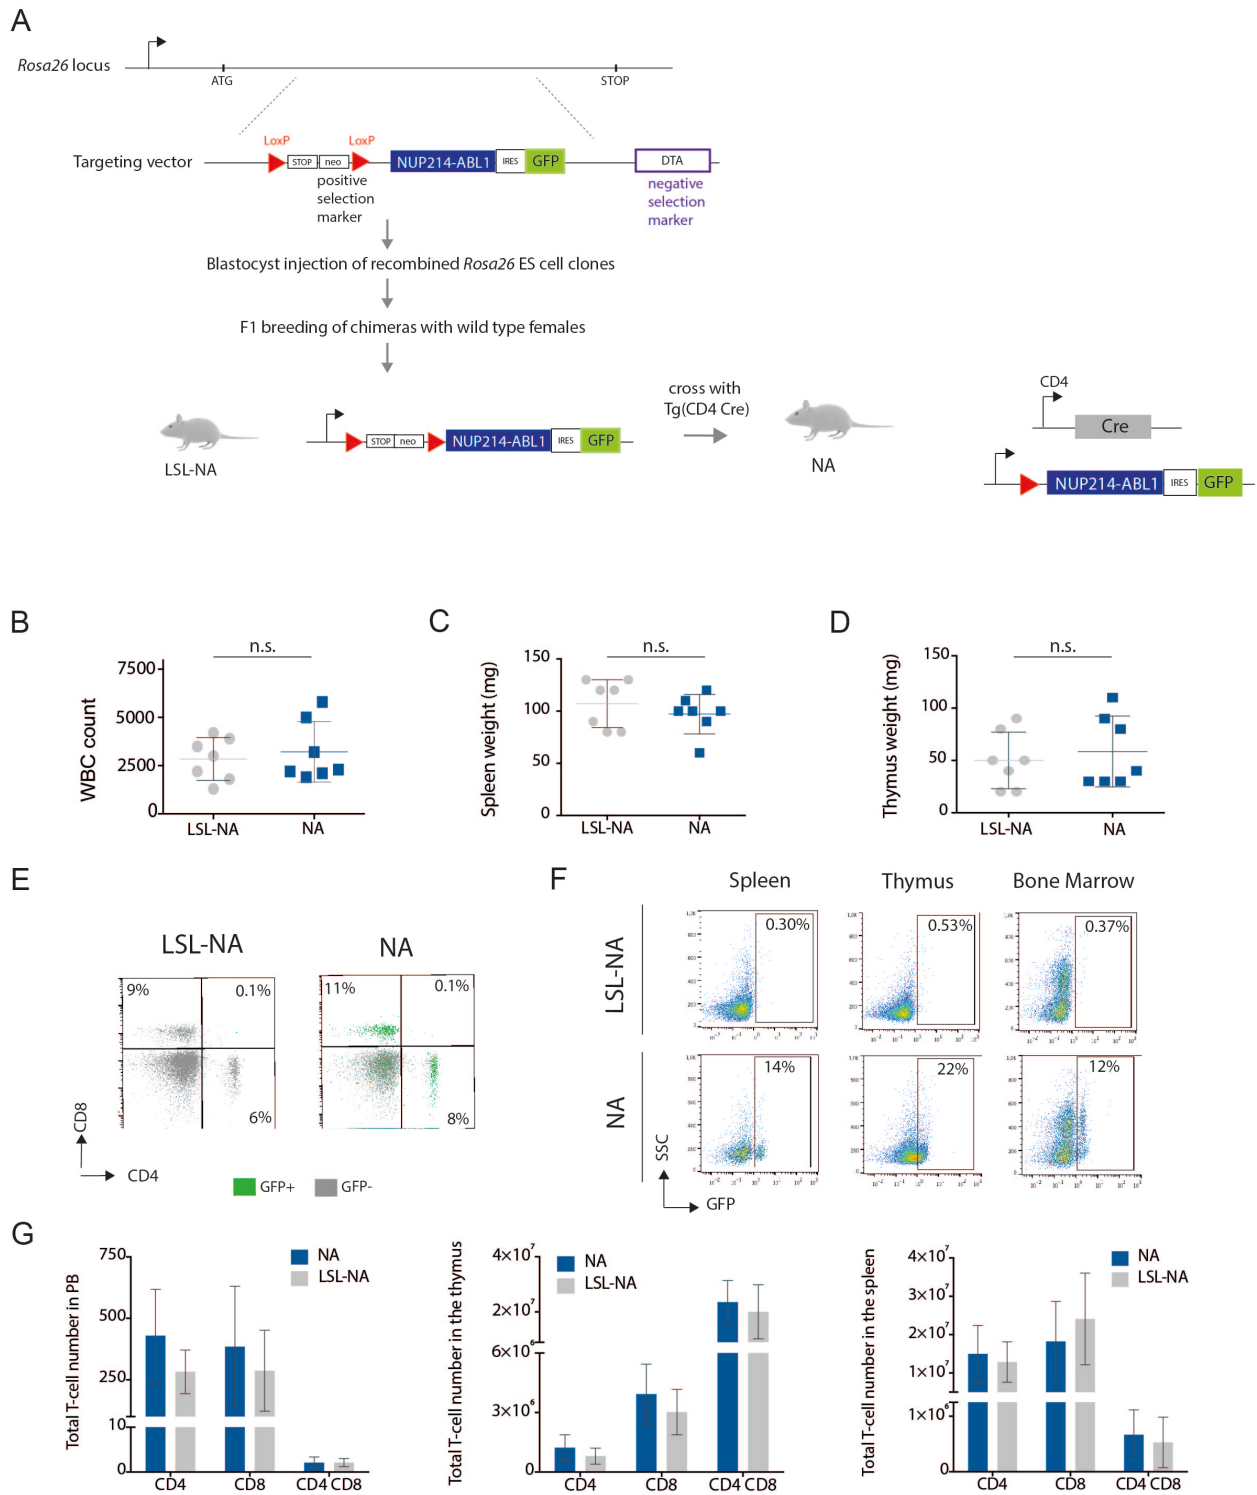

**Figure S1 (Related to Figure 1): Expression of NUP214-ABL1 alone is not sufficient to cause T-ALL in a transgenic mouse model**

(A) Schematic overview of the generation of the LSL-NA and the NA transgenic mouse models through homologous recombination in mouse embryonic stem (ES) cells. (B-D) White blood cell count (WBC, cells/μL) (B), Spleen weight (C) and thymus weight (D) in LSL-NA and NA mice at end



stage (>360 days). Data are represented as mean  $\pm$  SD. Statistical significance was calculated using unpaired two tailed t-test with equal variance. **(E)** Peripheral blood staining for CD4 and CD8 T cells in LSL-NA and NA mice at end stage. **(F)** FACS analysis of spleen, thymus and bone marrow analyzing the frequency of GFP cells in LSL-NA and NA mice at end stage. **(G)** Total T cell numbers in LSL-NA and NA in peripheral blood (1  $\mu$ L), thymus or spleen. Data are represented as mean  $\pm$  SD. Statistical significance calculated using unpaired two tailed t-test with equal variance.

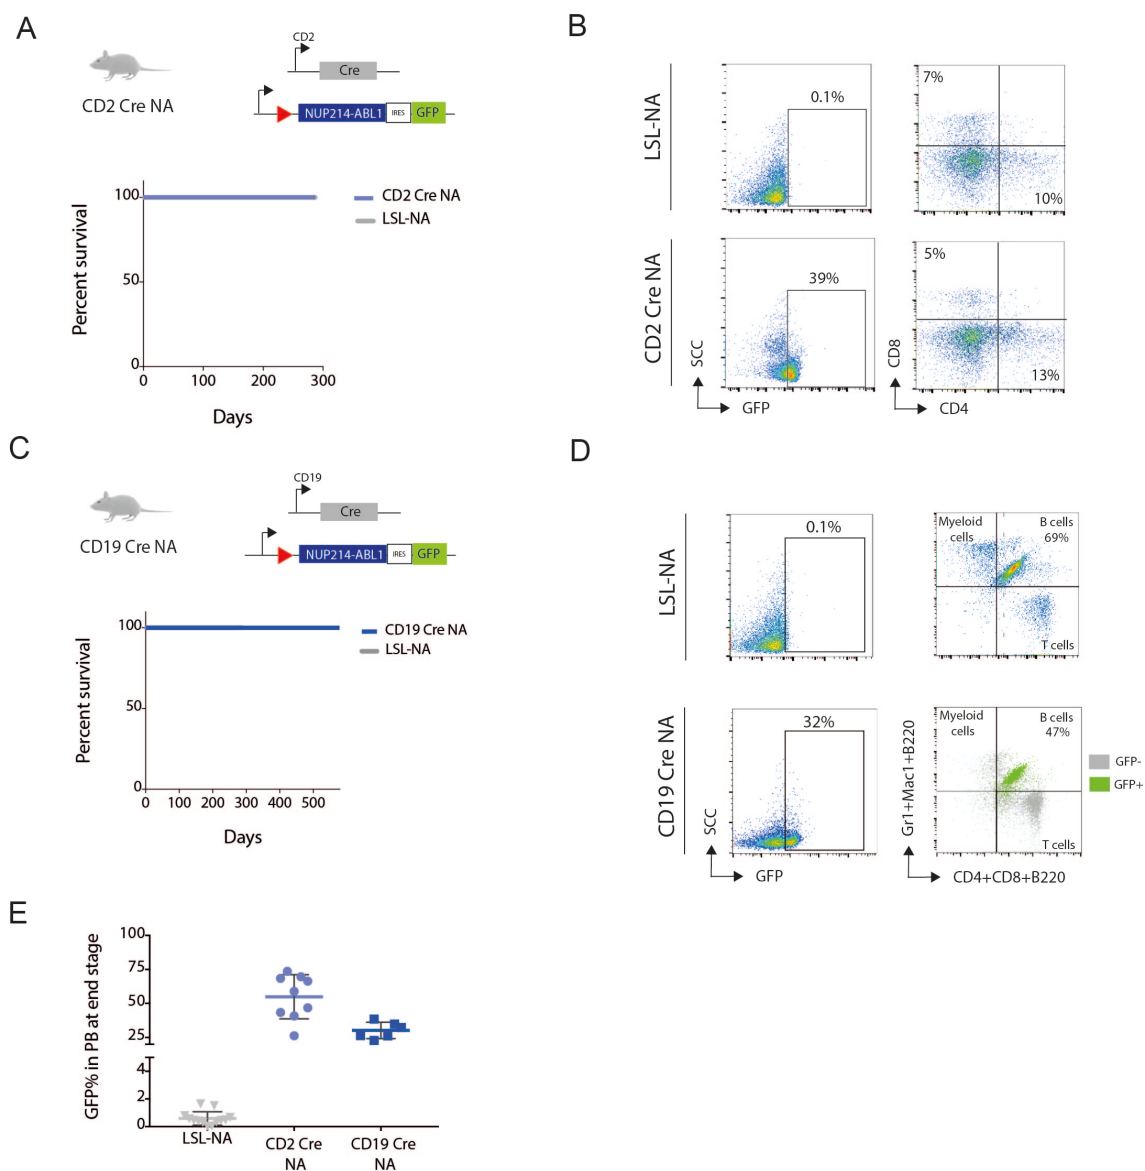

**Figure S2 (Related to Figure 1): Expression of NUP214-ABL1 in lymphoid progenitors or B-cells is not sufficient to cause leukemia development**

**(A)** Schematic of LSL-NA mice crossed with CD2 Cre mice (top) and associated Kaplan-Meier survival curve for CD2 Cre NA and LSL-NA mice (bottom). **(B)** FACS analysis of peripheral blood for GFP and CD4/CD8 staining of LSL-NA and CD2 Cre NA mice. **(C)** Schematic of LSL-NA mice crossed with CD19 Cre mice (top) and associated Kaplan-Meier survival curve for CD19 Cre NA and LSL-NA mice (bottom). **(D)** FACS analysis of peripheral blood for GFP and proportion of myeloid cells, B cells and T cells in CD19 Cre NA mice. **(E)** Percentage of GFP positive cells in peripheral blood of LSL-NA, CD2 Cre NA and CD19 Cre NA mice at end stage (>360 days). Data are represented as mean  $\pm$  SD.

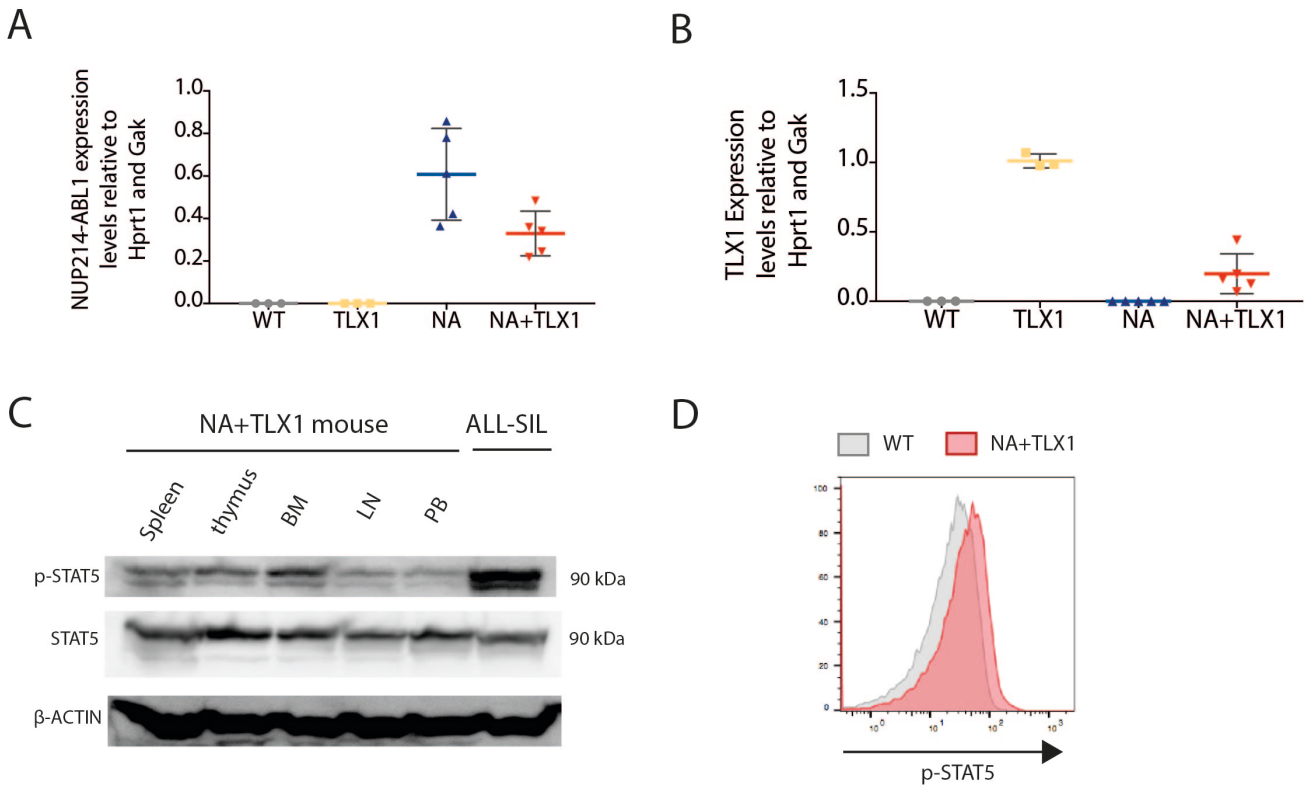

**Figure S3 (Related to Figure 1): NUP214-ABL1 and TLX1 expression in the transgenic mouse models.**

**(A-B)** qRT-PCR of NUP214-ABL1 **(A)** or TLX1 **(B)** expression in CD4<sup>+</sup>CD8<sup>+</sup> thymus or spleen cells harvested from the different transgenic mouse models. Data are represented as mean ± SD. Statistical significance calculated using unpaired two tailed t-test with equal variance. **(C)** Western blot to show activation of STAT5 in different tissues of NA+TLX1 mice and in ALL-SIL cells. **(D)** phospho-flow for phospho-STAT5 (p-STAT5) in peripheral blood cells of NA+TLX1 mice.

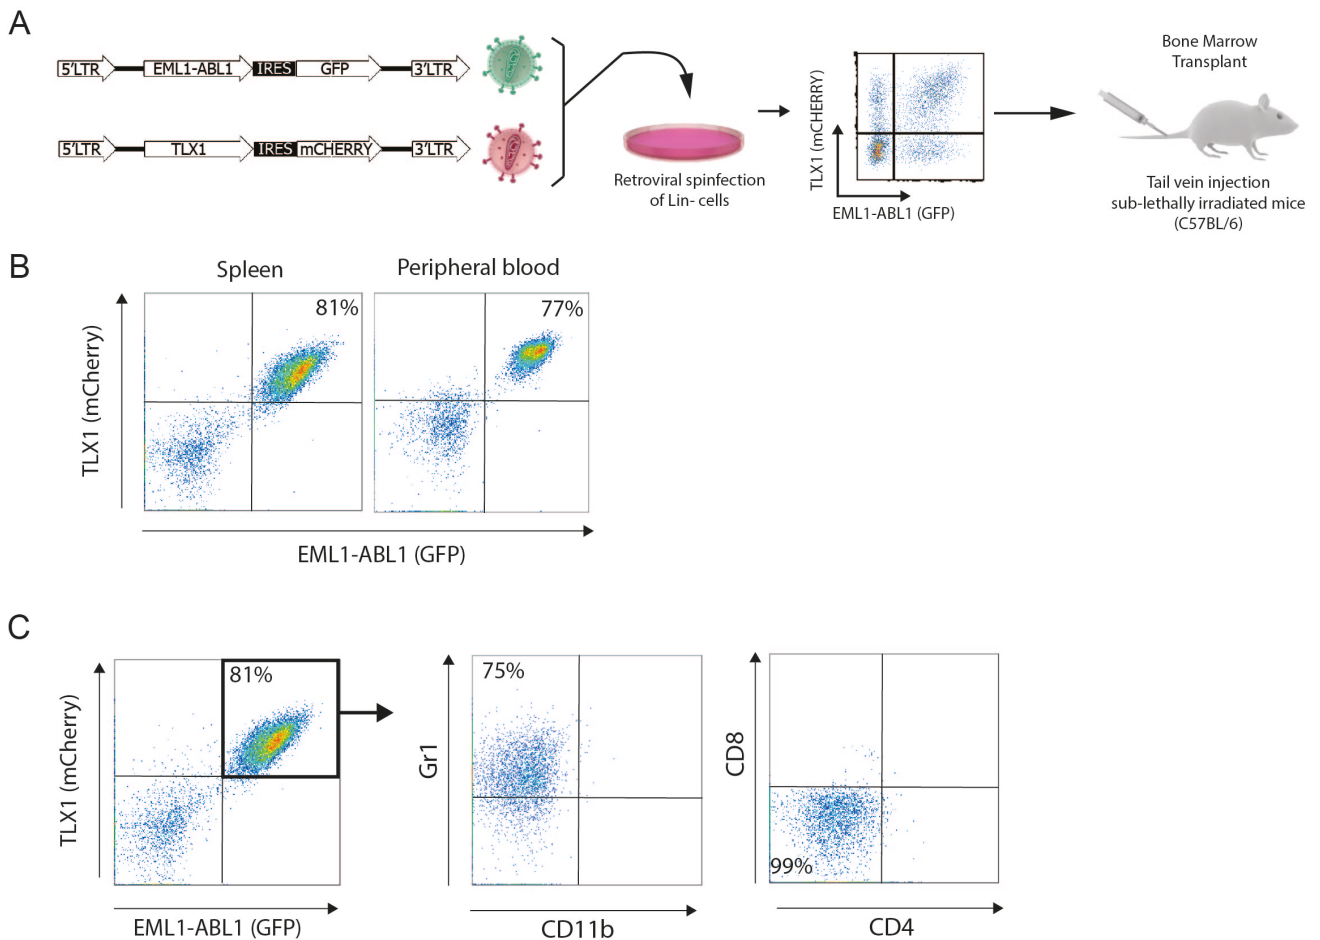

**Figure S4 (Related to Figure 1): Cooperation between EML1-ABL1 and TLX1 in an ex vivo pro T cell system and in a mouse bone marrow transplant model.**

**(A)** Schematic of the strategy followed for the bone marrow transplant assay **(B)** FACS analysis of spleen and peripheral blood for EML1-ABL1 (GFP) and TLX1 (mCherry) expression in spleen cells (left) and peripheral blood (right) from a EML1-ABL1+TLX1 leukemic mouse. **(C)** FACS analysis of EML1-ABL1+ TLX1+ spleen cells from a EML1-ABL1 + TLX1 leukemic mouse, showing expression of Gr1 and CD11b or CD4 and CD8.

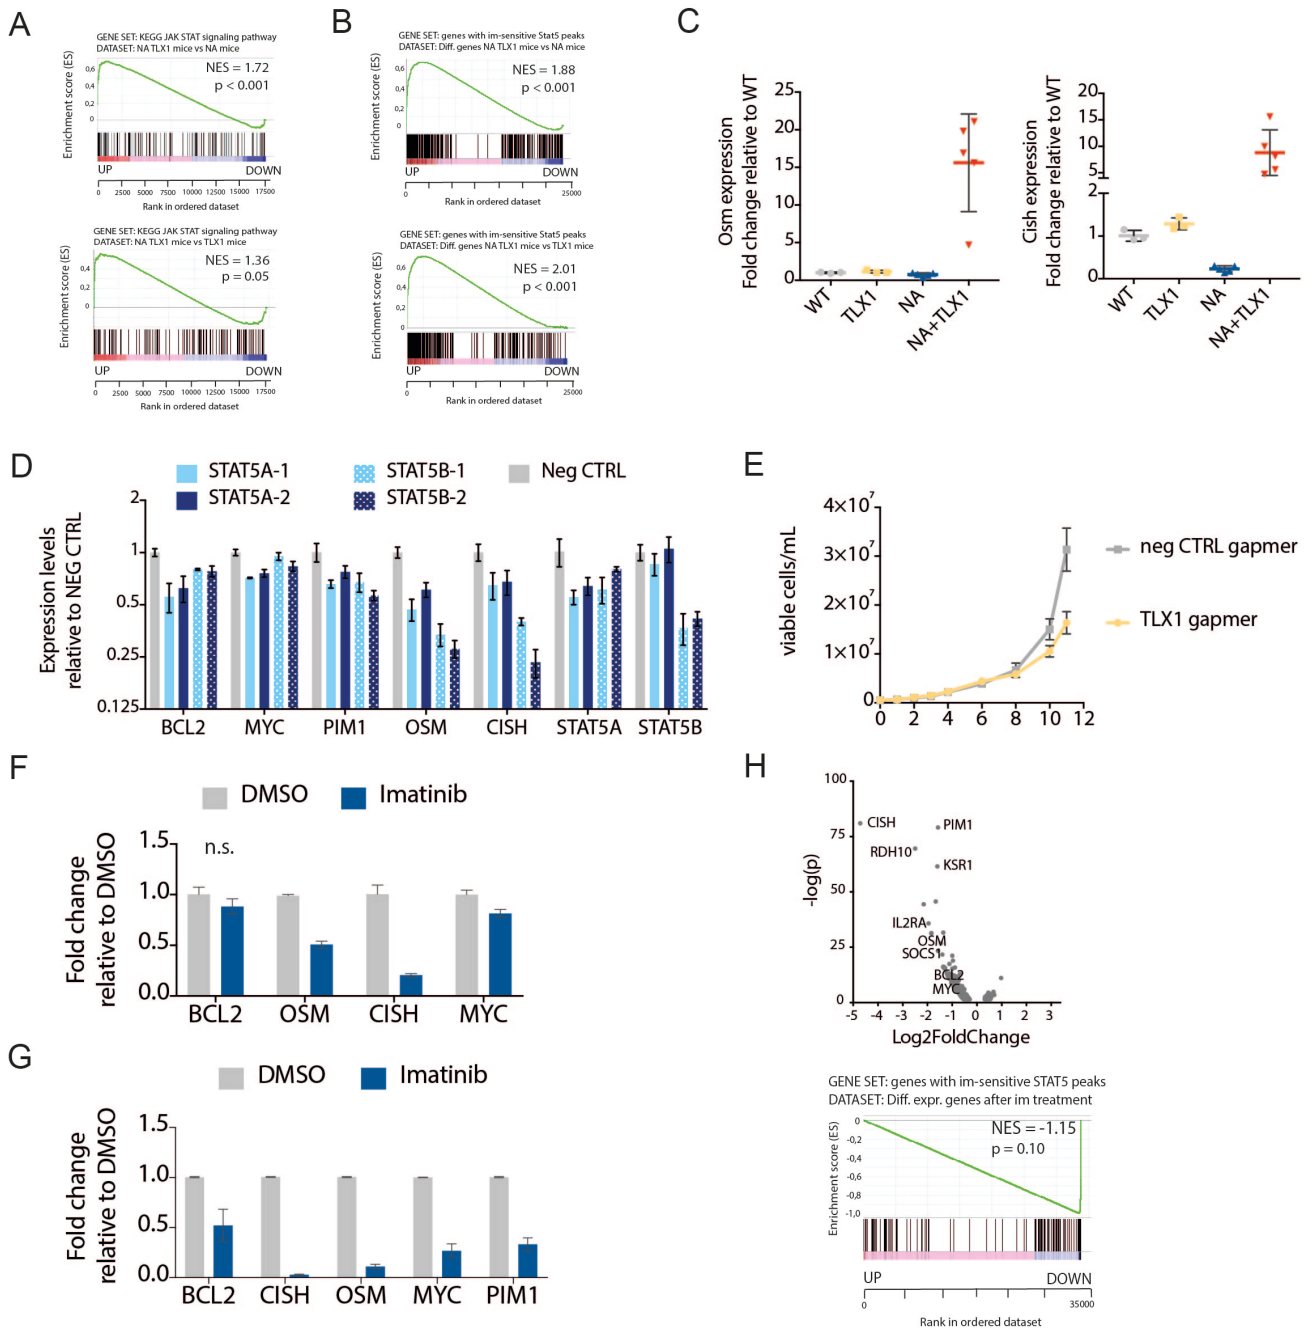

**Figure S5 (Related to Figure 2): NUP214-ABL1 and TLX1 activate the JAK-STAT pathway through STAT5 signaling**

**(A)** Gene set enrichment analysis (GSEA) showing enrichment of JAK-STAT pathway genes in the differentially expressed genes in NA+TLX1 compared to NA (top) or NA+TLX1 compared to TLX1 (bottom). (NES = normalized enrichment score). **(B)** GSEA showing enrichment of STAT5 target genes (as defined by ChIP-seq) in the differentially expressed genes in NA+TLX1 compared to NA (top) or TLX1 (bottom). (NES = normalized enrichment score). **(C)** qRT-PCR to show *Osm* (left) and *Cish* (right) expression in the different transgenic mouse models. Statistical significance calculated using unpaired two tailed t-test with equal variance. Data are represented as mean  $\pm$  SD. **(D)** qRT-PCR of STAT5 target genes after 48 hr treatment with 10  $\mu$ M STAT5 gapmers. Data are

represented as mean  $\pm$  SD. **(E)** Growth curve of ALL-SIL cells treated with 10  $\mu$ M TLX1 or negative control (neg CTRL) gapmer for 12 days. Data are represented as mean  $\pm$  SD. **(F,G)** qRT-PCR of STAT5 target genes after 3 hr imatinib treatment in the NUP214-ABL1<sup>+</sup>TLX1<sup>+</sup> cell line PEER **(F)** or NUP214-ABL1<sup>+</sup>TLX3<sup>+</sup> patient-derived xenograft cells (X12) **(G)**. Data are represented as mean  $\pm$  SD. **(H)** Volcano plot showing up- and downregulated genes (top) and GSEA to show enrichment of STAT5 target genes in differentially expressed genes (bottom) after imatinib treatment (500 nM imatinib or DMSO for 3 hr) in a NUP214-ABL1<sup>+</sup>TLX3<sup>+</sup> patient-derived xenograft sample X12 (n=3 – experiment was performed using human leukemic cells isolated from 3 separate xenograft NSG mice).

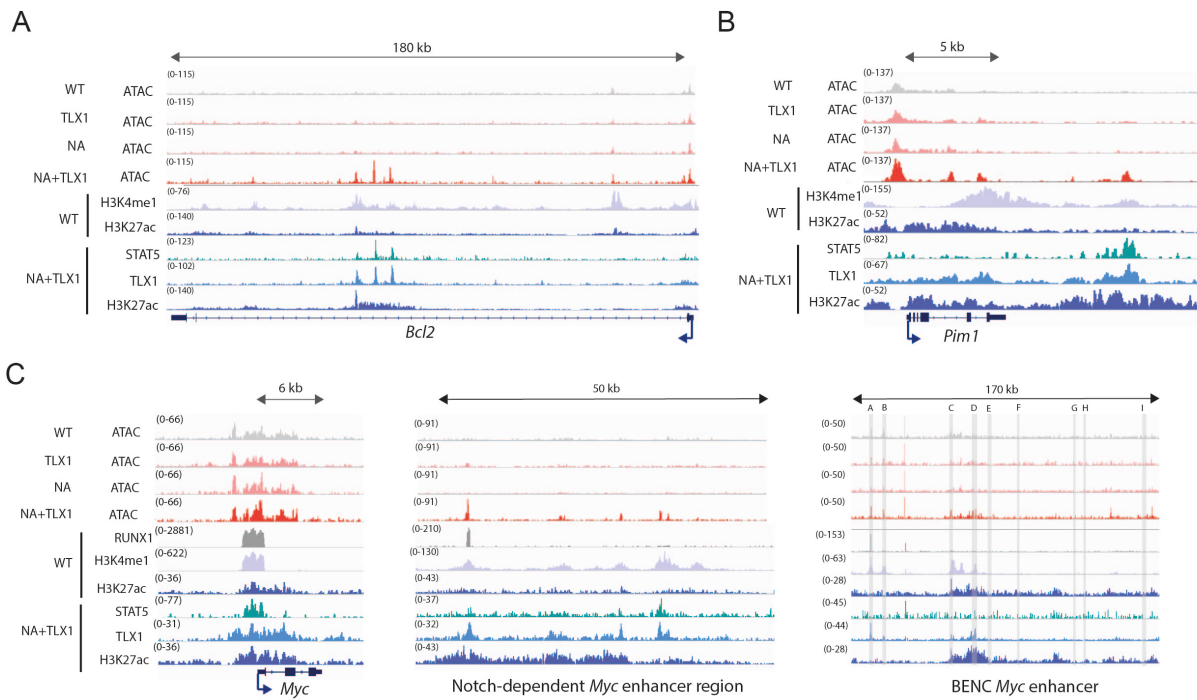

**Figure S6 (related to Figure 4): TLX1 and STAT5 bind in newly accessible enhancer regions. (A-C)** ATAC-seq tracks (performed in CD4<sup>+</sup>CD8<sup>+</sup> WT, NA, TLX1 and NA+TLX1 cells) and ChIP-seq tracks (H3K4me1, H3K27ac in WT cells, STAT5, TLX1, H3K27ac in NA+TLX1 cells) at the *Bcl2* locus (A), the *Pim1* locus (B) and at the *Myc* gene locus and enhancer loci (C).

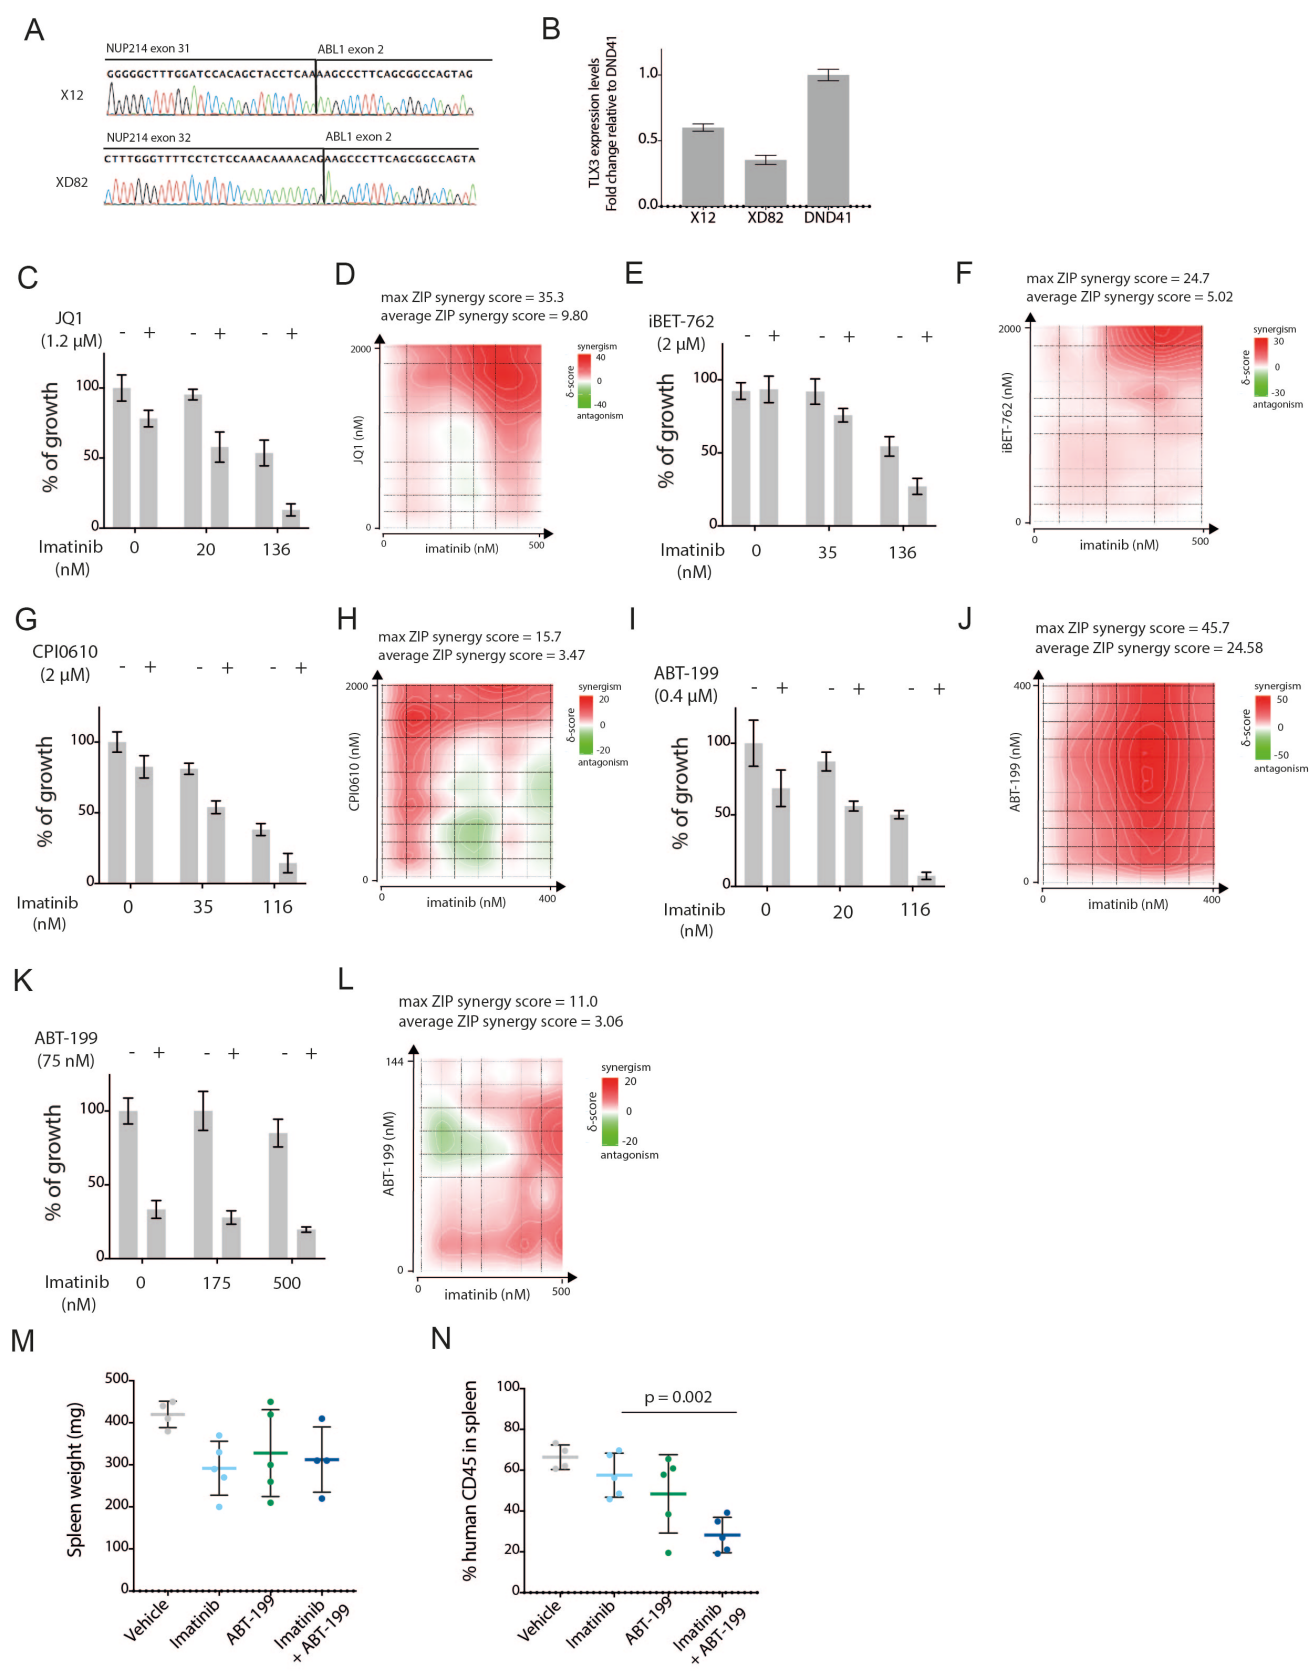

**Figure S7 (Related to Figure 6): Downstream effectors of NUP214-ABL1 and TLX1 can be targeted to improve treatment strategies.**

**(A)** Sanger sequencing profile of the *NUP214-ABL1* fusion detected in PDX samples X12 and



XD82. **(B)** qRT-PCR analysis of *TLX3* expression in T-ALL PDX samples X12 and XD82. Data are represented as mean  $\pm$  SD. **(C)** Growth of ALL-SIL cells after 48 hr treatment with imatinib with or without JQ1 (1.2  $\mu$ M). Data are represented as mean  $\pm$  SD. **(D)** Synergy matrix plot showing  $\delta$ -scores for ALL-SIL cells treated with imatinib + JQ1. **(E)** Growth of ALL-SIL cells after 48 hr treatment with imatinib with or without iBET-762 (2  $\mu$ M). Data are represented as mean  $\pm$  SD. **(F)** Synergy matrix plot showing  $\delta$ -scores for ALL-SIL cells treated with imatinib + iBET-762. **(G)** Growth of ALL-SIL cells after 48 hr treatment with imatinib with or without CPI0610 (2  $\mu$ M). Data are represented as mean  $\pm$  SD. **(H)** Synergy matrix plot showing  $\delta$ -scores for the combination treatment of ALL SIL cells with imatinib + CPI0610. **(I)** Growth of ALL-SIL cells after 48 hr treatment with imatinib with or without ABT-199 (0.4  $\mu$ M). Data are represented as mean  $\pm$  SD. **(J)** Synergy matrix plot showing  $\delta$ -scores for the combination treatment of ALL SIL cells with imatinib + ABT-199. **(K)** Growth of NA+TLX1 mouse leukemic cells after 48 hr treatment with imatinib with or without ABT-199 (75 nM). Data are represented as mean  $\pm$  SD. **(L)** Synergy matrix plot showing  $\delta$ -scores for the combination treatment of NA+TLX1 mouse leukemic cells with imatinib + ABT-199. **(M)** Spleen weight of mice treated with ABT-199, imatinib or a combination of imatinib + ABT-199. Data are represented as mean  $\pm$  SD. **(N)** % human CD45 cells detected by flow cytometry in spleen samples of mice treated with ABT-199, imatinib or a combination of imatinib + ABT-199. Statistical significance calculated using unpaired two tailed t-test with equal variance. Data are represented as mean  $\pm$  SD.

**Table S2 (Related to STAR methods): primers for genotyping of the transgenic mouse strains**

| <b>LSL-NA</b>             |                                 |
|---------------------------|---------------------------------|
| LSL-NA Fw                 | 5'-AGAGGGGGAGGTTTCTTCAGT-3'     |
| LSL-NA Rv                 | 5'-ACACCATTCCCCATTGTGATTAT-3'   |
| WT Fw                     | 5'-CAATACCTTTCTGGGAGTTCTCTGC-3' |
| WT Rv                     | 5'-CTGCATAAAACCCCAGATGACTACC-3' |
| <b>TLX1</b>               |                                 |
| Fw                        | 5'-AGGTACCCTCCTTGGTGGAG-3'      |
| Rv                        | 5'-AAAGTAGAAGGGGGAGGGGAGG-3'    |
| <b>CD4 Cre / CD19 Cre</b> |                                 |
| Fw                        | 5'-GCGGTCTGGCAGTAAAACTATC-3'    |
| Rv                        | 5'-GTGAAACAGCATTGCTGTCACTT-3'   |
| <b>CD2 iCre</b>           |                                 |
| Fw                        | 5'-AGATGCCAGGACATCAGGAACCTG-3'  |
| Rv                        | 5'-ATCAGCCACACCAGACACAGAGATC-3' |

**Table S3 (Related to STAR methods): primers for qRT-PCR**

| <b>Mouse</b> |    |                              |
|--------------|----|------------------------------|
| Myc          | Fw | 5'-AGAGCTCCTCGAGCTGTTTG-3'   |
|              | Rv | 5'-TGAAGTTCACGTTGAGGGG-3'    |
| Bcl2         | Fw | 5'-AGTACCTGAACCGGCATCTG-3'   |
|              | Rv | 5'-AGGGTCTTCAGAGACAGCCA-3'   |
| Osm          | Fw | 5'-TGCTCCAACTCTCCTCTCAG-3'   |
|              | Rv | 5'-CAGGTGTGTTTCAGGTTTTGG-3'  |
| Cish         | Fw | 5'-CAGAGAATGAACCGAAGGTG-3'   |
|              | Rv | 5'-CCTCGCTGGCTGTAATAGAAC-3'  |
| <b>Human</b> |    |                              |
| TLX1         | Fw | 5'-GACAAAGTGGAGACGGCAGA-3'   |
|              | Rv | 5'-CTGTGCCAGGCTCTTCTGG-3'    |
| NUP214-ABL1  | Fw | 5'-AGGAAAACCCAGTCAGGATG-3'   |
|              | Rv | 5'-TGAGGCTCAAAGTCAGATGC-3'   |
| MYC          | Fw | 5'-AAAACCAGCAGCCTCCCGCGA-3'  |
|              | Rv | 5'-AATACGGCTGCACCGAGTCGT-3'  |
| OSM          | Fw | 5'-CAGCTCCAGAAGCAGACAGA-3'   |
|              | Rv | 5'-CCCTGCAGTGCTCTCTCAGT-3'   |
| PIM1         | Fw | 5'-AGGGTCTCTTCAGAATGTCAGC-3' |
|              | Rv | 5'-TGGATCTCAGCAGTTTCCTG-3'   |
| CISH         | Fw | 5'-CTGCTGTGCATAGCCAAGAC-3'   |
|              | Rv | 5'-GTGCCTTCTGGCATCTTCTG-3'   |
| BCL2         | Fw | 5'-GCCCTGTGGATGACTGAGTA-3'   |
|              | Rv | 5'-AGGGCCAAACTGAGCAGAG-3'    |
